# Supplementary material
Source: publisher site journal article supplement (https://www.spandidos-publications.com/4975/downloadSupplementary)
Supplement: Supplementary file 1 [file downloadSupplementary]

## Sheet: TCGA_AA_APOBEC
Table SIII. APOBEC enrichment scores.
Tumor_Sample_Barcode	A>G	T>C	C>T	G>A	A>T	T>A	A>C	T>G	C>A	G>T	C>G	G>C	n_A	n_T	n_G	n_C	n_mutations	n_C>G_and_C>T	tCw_to_A	tCw_to_T	tCw_to_G	tCw	wGa_to_C	wGa_to_T	wGa_to_A	wGa	tCw_to_G+tCw_to_T	n_bg_A	n_bg_T	n_bg_G	n_bg_C	n_bg_tcw	n_bg_wga	n_bg_bases	APOBEC_Enrichment	non_APOBEC_mutations	fraction_APOBEC_mutations	Fisher_P-value	or	ci.up	ci.low	APOBEC_Enriched	fdr
TCGA-3C-AALI	9	9	195	188	10	11	4	3	43	44	151	149	23	23	381	389	816	683	17	107	117	241	117	24	110	251	451	7015	6747	7074	7167	1127	1213	28003	4.01865	365	0.553	1.1589e-05	1.41563	1.2325	Inf	yes	0.00187741
TCGA-E2-A1LG	1	2	50	49	0	1	1	1	8	10	49	48	2	4	107	107	220	196	3	27	38	68	43	4	22	69	130	1910	2017	2051	2058	347	359	8036	3.86028	90	0.591	0.0162902	1.4012	1.07675	Inf	yes	1
TCGA-GM-A2DO	4	0	48	81	0	2	2	3	9	3	37	31	6	5	115	94	220	197	4	25	27	56	28	2	50	80	130	2036	1945	2097	1999	341	364	8077	3.83396	90	0.591	0.0217877	1.37469	1.05755	Inf	yes	1
TCGA-BH-A209	1	0	30	31	3	1	0	0	5	10	21	27	4	1	68	56	129	109	5	14	20	39	21	3	17	41	72	1101	1146	1121	1101	190	195	4469	3.81232	57	0.558	0.0740806	1.37298	0.960919	Inf	yes	1
TCGA-LL-A73Y	9	9	40	32	5	3	1	4	7	8	32	46	15	16	86	79	196	150	3	17	24	44	38	3	15	56	94	1474	1506	1624	1546	228	259	6150	4.07912	102	0.48	0.115366	1.24702	0.927136	Inf	yes	1
TCGA-BH-A0B0	1	1	36	34	4	0	0	0	2	3	10	10	5	1	47	48	101	90	1	24	8	33	8	3	18	29	58	897	928	924	941	161	157	3690	3.77952	43	0.574	0.158777	1.28274	0.868104	Inf	yes	1
TCGA-A2-A0EQ	12	11	69	59	1	1	4	4	17	8	70	62	17	16	129	156	318	260	3	34	51	88	50	3	28	81	163	2580	2689	2687	2704	513	454	10660	3.49508	155	0.513	0.167439	1.14442	0.915709	Inf	yes	1
TCGA-A2-A0CL	4	2	57	48	1	1	2	0	9	12	31	38	7	3	98	97	205	174	4	29	22	55	30	7	27	64	108	1819	1844	1699	1772	311	342	7134	3.29926	97	0.527	0.217258	1.14766	0.872775	Inf	yes	1
TCGA-OL-A66L	3	5	29	29	1	1	2	0	3	4	9	10	6	6	43	41	96	77	3	14	7	24	8	2	19	29	48	798	738	819	802	123	138	3157	3.87162	48	0.5	0.24537	1.21485	0.798624	Inf	yes	1
TCGA-B6-A0WZ	1	0	26	34	1	1	1	1	4	4	11	13	3	2	51	41	97	84	3	15	5	23	9	1	22	32	51	918	939	772	815	164	164	3444	2.93761	46	0.526	0.500816	1.02766	0.689561	Inf	yes	1
TCGA-BH-A42V	3	0	17	18	0	0	0	0	1	4	11	5	3	0	27	29	59	51	0	13	8	21	3	2	6	11	30	492	526	519	554	97	84	2091	3.48716	29	0.508	0.556908	1.00285	0.59904	Inf	yes	1
TCGA-E2-A1LB	3	2	12	14	2	1	1	1	5	4	7	7	6	4	25	24	59	40	1	5	2	8	7	1	8	16	22	444	384	386	426	59	66	1640	3.5728	37	0.373	0.658586	0.924939	0.515973	Inf	yes	1
TCGA-BH-A5J0	1	7	32	32	0	1	1	1	4	11	4	10	2	9	53	40	104	78	1	17	3	21	7	1	15	23	42	790	754	831	823	125	131	3198	3.47897	62	0.404	0.780289	0.85908	0.571321	Inf	yes	1
TCGA-S3-AA15	1	2	10	18	1	2	1	1	3	18	12	9	3	5	45	25	78	49	2	5	8	15	6	1	8	15	27	507	508	550	444	86	93	2009	3.05986	51	0.346	0.784736	0.829162	0.490121	Inf	yes	1
TCGA-BH-A42U	0	1	9	14	0	1	0	0	2	6	1	2	0	2	22	12	36	26	0	4	1	5	2	0	6	8	13	256	235	292	283	37	44	1066	3.54938	23	0.361	0.80525	0.769102	0.366695	Inf	yes	1
TCGA-AO-A0JA	1	0	12	11	0	1	0	0	0	4	2	2	1	1	17	14	33	27	0	8	0	8	1	1	5	7	14	282	291	276	258	49	55	1107	2.66239	19	0.424	0.838599	0.73359	0.354898	Inf	yes	1
TCGA-B6-A0WS	3	3	4	2	1	1	0	1	0	3	1	0	4	5	5	5	19	7	0	1	1	2	0	1	1	2	3	60	83	64	80	13	10	287	2.68323	16	0.158	0.882344	0.542368	0.103716	Inf	yes	1
TCGA-EW-A6SD	5	2	19	14	3	0	0	1	6	11	6	10	8	3	35	31	77	49	3	8	4	15	6	1	6	13	24	484	478	573	474	79	77	2009	3.28728	53	0.312	0.924552	0.685992	0.405443	Inf	yes	1
TCGA-A2-A0CM	2	0	16	17	3	1	1	0	5	6	10	9	6	1	32	31	70	52	1	4	7	12	5	1	9	15	25	517	550	525	540	86	86	2132	2.97686	45	0.357	0.938989	0.671772	0.403764	Inf	yes	1
TCGA-AO-A0JE	0	5	16	12	0	0	0	1	3	9	8	6	0	6	27	27	60	42	1	3	8	12	2	2	7	11	20	448	424	431	419	73	65	1722	2.93306	40	0.333	0.942371	0.639668	0.360719	Inf	yes	1
TCGA-OL-A5RW	11	11	31	52	8	7	4	5	17	13	49	46	23	23	111	97	254	178	1	10	28	39	28	3	24	55	90	1665	1783	1988	1862	292	309	7298	3.23898	164	0.354	0.97665	0.745508	0.572402	Inf	yes	1
TCGA-A7-A5ZW	3	4	8	10	1	0	0	0	4	4	2	4	4	4	18	14	40	24	1	3	2	6	3	1	1	5	9	217	224	230	313	42	19	984	3.33811	31	0.225	0.980599	0.458577	0.202219	Inf	yes	1
TCGA-EW-A1PB	1	5	27	34	5	4	6	2	21	9	36	33	12	11	76	84	183	130	5	11	18	34	18	2	17	37	64	1378	1288	1376	1288	220	226	5330	2.9406	119	0.35	0.985306	0.686873	0.502632	Inf	yes	1
TCGA-BH-A0DG	2	2	8	14	0	1	3	2	3	4	3	5	5	5	23	14	47	30	1	2	2	5	4	1	3	8	11	294	271	367	298	38	47	1230	2.86863	36	0.234	0.989442	0.448567	0.216303	Inf	yes	1
TCGA-B6-A0RH	5	0	13	13	1	1	2	1	0	1	6	3	8	2	17	19	46	35	0	4	3	7	1	0	5	6	13	349	346	354	386	54	68	1435	2.25293	33	0.283	0.993494	0.446313	0.229606	Inf	yes	1
TCGA-B6-A0WW	6	1	11	10	2	0	1	2	3	3	3	5	9	3	18	17	47	29	2	4	0	6	2	1	3	6	9	243	264	342	340	34	31	1189	3.25623	38	0.191	0.996961	0.368687	0.168473	Inf	yes	1
TCGA-AO-A0J4	3	8	26	17	4	6	4	4	13	9	30	22	11	18	48	69	146	95	3	5	17	25	16	3	4	23	42	923	960	985	1027	170	138	3895	2.88804	104	0.288	0.997449	0.567529	0.391326	Inf	yes	1
TCGA-A2-A3XZ	1	1	17	13	3	1	0	0	1	4	6	9	4	2	26	24	56	45	0	4	3	7	7	1	3	11	17	401	508	470	466	78	68	1845	2.42192	39	0.304	0.997934	0.433409	0.243654	Inf	yes	1
TCGA-A7-A56D	3	8	67	69	3	8	0	2	11	14	22	33	6	18	116	100	240	191	7	24	12	43	22	2	32	56	90	1848	1882	2066	2035	305	324	7831	3.07219	150	0.375	0.998075	0.658875	0.510356	Inf	yes	1
TCGA-OL-A5RY	1	0	2	6	0	0	1	0	0	3	1	2	2	0	11	3	16	11	0	0	0	0	1	1	1	3	2	91	119	117	124	19	8	451	1.6229	14	0.125	0.998521	0.164188	0.0249652	Inf	no	1
TCGA-LL-A5YO	4	3	8	8	2	1	5	3	6	5	8	10	11	7	23	22	63	34	3	2	3	8	5	1	1	7	11	309	314	368	403	54	47	1394	2.46971	52	0.175	0.998562	0.365669	0.180801	Inf	yes	1
TCGA-A1-A0SJ	1	1	11	11	1	0	1	1	4	2	1	6	3	2	19	16	40	29	1	2	0	3	3	0	3	6	8	258	234	349	348	35	42	1189	2.49709	32	0.2	0.999123	0.311807	0.137413	Inf	yes	1
TCGA-A2-A3XW	3	2	4	3	0	2	1	0	0	1	1	2	4	4	6	5	19	10	0	0	0	0	0	0	1	1	1	109	76	105	120	6	16	410	1.02273	18	0.053	0.999315	0.101234	0.00459581	Inf	no	1
TCGA-E2-A1L8	4	2	6	11	3	0	3	2	1	4	4	1	10	4	16	11	41	22	0	1	2	3	0	0	2	2	5	219	198	257	228	25	36	902	1.807	36	0.122	0.999505	0.236656	0.0822862	Inf	no	1
TCGA-V7-A7HQ	2	2	5	7	1	1	2	0	2	3	5	2	5	3	12	12	32	19	1	1	3	5	0	0	0	0	4	185	164	236	194	25	24	779	1.84748	28	0.125	0.99957	0.206524	0.0620045	Inf	no	1
TCGA-S3-AA14	0	0	8	9	0	1	2	0	1	0	3	2	2	1	11	12	26	22	0	1	1	2	1	0	2	3	5	221	222	236	223	27	32	902	1.7681	21	0.192	0.999588	0.231265	0.08038	Inf	no	1
TCGA-WT-AB41	2	2	27	20	1	0	1	3	3	1	2	2	4	5	23	32	64	51	1	10	0	11	1	0	6	7	17	479	490	545	577	72	64	2091	2.75	47	0.266	0.999622	0.389361	0.22337	Inf	yes	1
TCGA-AQ-A54O	2	1	11	4	0	1	1	0	4	1	1	0	3	2	5	16	26	16	1	1	0	2	0	0	2	2	3	161	161	169	165	30	27	656	1.09868	23	0.115	0.999779	0.160546	0.0383667	Inf	no	1
TCGA-A7-A26G	4	2	11	15	2	3	1	0	12	5	8	6	7	5	26	31	69	40	0	3	3	6	3	2	3	8	12	365	401	420	454	64	55	1640	2.20336	57	0.174	0.999805	0.323047	0.166978	Inf	yes	1
TCGA-A2-A259	3	1	9	9	0	0	1	0	0	1	3	2	4	1	12	12	29	23	0	2	1	3	0	0	2	2	5	229	263	204	247	36	40	943	1.29005	24	0.172	0.999859	0.207697	0.0726944	Inf	no	1
TCGA-A2-A0D4	1	5	10	8	1	2	1	1	4	6	5	0	3	8	14	19	44	23	0	1	3	4	0	1	1	2	5	241	222	250	230	34	42	943	1.373	39	0.114	0.999861	0.206861	0.0723234	Inf	no	1
TCGA-OL-A6VR	1	0	2	8	0	0	0	0	12	14	0	2	1	0	24	14	39	12	1	0	0	1	0	1	1	2	1	109	101	150	132	11	16	492	0.87037	38	0.026	0.999891	0.0774545	0.00357911	Inf	no	1
TCGA-AC-A2BM	0	1	7	6	4	1	0	3	3	4	2	0	4	5	10	12	31	15	1	0	2	3	0	0	0	0	2	148	120	160	187	29	22	615	0.90719	29	0.065	0.999933	0.113083	0.0180082	Inf	no	1
TCGA-S3-AA0Z	3	7	15	22	1	3	3	2	5	9	3	4	7	12	35	23	77	44	2	4	2	8	3	2	4	9	13	466	448	436	454	73	65	1804	1.90547	64	0.169	0.999949	0.303552	0.161735	Inf	no	1
TCGA-B6-A0IE	2	0	14	11	3	0	2	3	3	3	0	2	7	3	16	17	43	27	0	2	0	2	1	0	3	4	6	270	282	260	295	46	37	1107	1.48594	37	0.14	0.999951	0.20913	0.0815636	Inf	no	1
TCGA-B6-A0RM	4	1	12	11	0	2	0	1	1	4	0	0	4	4	15	13	36	23	0	2	0	2	0	0	2	2	4	205	215	256	267	28	29	943	1.59573	32	0.111	0.999953	0.171066	0.0527443	Inf	no	1
TCGA-BH-A6R8	1	2	14	8	1	1	0	0	2	7	2	4	2	3	19	18	42	28	0	3	1	4	1	0	1	2	6	277	260	313	298	41	38	1148	1.65732	36	0.143	0.999961	0.207244	0.081173	Inf	no	1
TCGA-EW-A6SC	3	4	12	15	0	0	0	0	5	6	0	1	3	4	22	17	46	28	0	1	0	1	0	0	5	5	6	285	284	290	289	41	39	1148	1.55089	40	0.13	0.999965	0.205459	0.0804391	Inf	no	1
TCGA-B6-A0X5	6	4	10	10	0	0	2	1	6	6	2	3	8	5	19	18	50	25	5	2	1	8	0	4	2	6	5	250	227	243	305	46	33	1025	1.38734	45	0.1	0.999967	0.184926	0.0655304	Inf	no	1
TCGA-LL-A5YM	1	3	13	8	0	3	1	1	3	2	4	1	2	7	11	20	40	26	0	2	1	3	1	0	1	2	5	248	220	296	302	38	42	1066	1.4375	35	0.125	0.999971	0.18531	0.0659408	Inf	no	1
TCGA-EW-A2FR	2	2	15	16	1	1	1	1	4	3	7	4	4	4	23	26	57	42	2	2	3	7	3	0	4	7	12	393	399	463	467	83	70	1722	1.73669	45	0.211	0.999974	0.279635	0.145451	Inf	no	1
TCGA-LD-A7W5	2	4	25	15	3	0	3	3	3	3	2	5	8	7	23	30	68	47	1	5	2	8	4	1	2	7	13	492	435	509	491	73	71	1927	1.9208	55	0.191	0.999986	0.283714	0.152417	Inf	no	1
TCGA-E2-A574	4	3	45	41	4	2	5	3	3	9	18	22	13	8	72	66	159	126	0	11	7	18	14	4	16	34	48	1278	1183	1360	1345	183	207	5166	2.64225	111	0.302	0.999987	0.468105	0.336978	Inf	yes	1
TCGA-S3-A6ZH	1	0	14	10	5	1	3	1	3	5	2	3	9	2	18	19	48	29	0	2	0	2	1	1	2	4	5	275	276	307	331	31	46	1189	1.42857	43	0.104	0.999991	0.173061	0.0622907	Inf	no	1
TCGA-OL-A5D6	5	6	20	10	2	3	1	1	1	5	2	2	8	10	17	23	58	34	0	4	2	6	0	1	1	2	7	332	335	367	360	42	61	1394	1.45317	51	0.121	0.999992	0.205481	0.0878336	Inf	no	1
TCGA-GM-A3XL	11	9	16	25	4	5	4	7	5	7	28	24	19	21	56	49	145	93	2	5	9	16	13	2	5	20	32	922	878	1037	976	129	144	3813	2.53716	113	0.221	0.999992	0.402283	0.270482	Inf	yes	1
TCGA-A2-A3XT	10	13	12	20	2	3	0	3	8	10	24	21	12	19	51	44	126	77	1	1	14	16	6	3	4	13	25	804	748	816	789	107	132	3157	2.18035	101	0.198	0.999992	0.366162	0.234086	Inf	yes	1
TCGA-OL-A66H	2	0	4	7	3	2	0	0	4	2	3	1	5	2	10	11	28	15	1	0	0	1	0	0	1	1	1	144	146	158	167	19	24	615	0.503876	27	0.036	0.999993	0.0571399	0.00269088	Inf	no	1
TCGA-BH-A1FC	8	7	32	24	3	3	6	0	11	11	17	9	17	10	44	60	131	82	3	6	9	18	5	1	8	14	28	826	858	851	827	135	126	3362	2.19531	103	0.214	0.999994	0.3732	0.243695	Inf	yes	1
TCGA-EW-A6S9	2	1	7	11	0	0	1	0	10	11	2	2	3	1	24	19	47	22	1	1	0	2	0	2	2	4	3	227	176	269	230	33	38	902	0.958387	44	0.064	0.999995	0.118729	0.0294994	Inf	no	1
TCGA-E2-A15L	5	3	10	7	1	0	1	0	3	0	1	4	7	3	11	14	35	22	1	0	1	2	1	0	1	2	3	210	209	214	269	39	34	902	0.902242	32	0.086	0.999995	0.118302	0.0294479	Inf	no	1
TCGA-OL-A5D8	0	5	7	12	2	2	3	0	1	3	3	1	5	7	16	11	39	23	1	0	0	1	1	0	2	3	3	214	198	266	265	30	35	943	1.06555	36	0.077	0.999995	0.119881	0.0299517	Inf	no	1
TCGA-A2-A0YF	1	4	8	9	2	2	0	1	7	6	2	1	3	7	16	17	43	20	3	1	0	4	0	2	1	3	2	199	180	204	237	25	21	820	0.958696	41	0.047	0.999996	0.0902507	0.0147805	Inf	no	1
TCGA-OL-A5RX	5	2	10	9	1	2	0	1	5	0	1	1	6	5	10	16	37	21	1	0	0	1	1	0	1	2	2	210	204	233	214	17	36	861	0.803235	35	0.054	0.999997	0.0901403	0.0147991	Inf	no	1
TCGA-LL-A73Z	2	2	11	14	6	2	3	2	2	7	2	2	11	6	23	15	55	29	0	1	0	1	1	0	2	3	4	283	254	361	291	16	55	1189	1.26663	51	0.073	0.999997	0.143706	0.0452885	Inf	no	1
TCGA-OL-A5D7	4	7	16	16	2	3	3	3	6	5	9	7	9	13	28	31	81	48	1	4	3	8	3	0	2	5	12	465	426	552	525	72	66	1968	1.95109	69	0.148	0.999997	0.253234	0.133768	Inf	no	1
TCGA-E2-A14X	2	1	12	16	0	0	0	0	1	6	2	2	2	1	24	15	42	32	0	3	0	3	1	2	2	5	6	307	311	330	364	53	34	1312	1.49569	36	0.143	0.999998	0.172458	0.0686079	Inf	no	1
TCGA-E2-A15O	0	3	10	8	2	3	0	1	5	1	0	2	2	7	11	15	35	20	0	1	0	1	0	0	1	1	2	165	204	185	266	34	29	820	0.715873	33	0.057	0.999998	0.0862284	0.0141355	Inf	no	1
TCGA-3C-AALJ	6	0	13	15	6	0	3	1	7	5	7	3	15	1	23	27	66	38	1	1	6	8	1	1	0	2	8	348	358	420	432	59	46	1558	1.70827	58	0.121	0.999998	0.202912	0.0924024	Inf	no	1
TCGA-B6-A0RL	2	4	15	34	1	1	1	1	3	6	2	3	4	6	43	20	73	54	1	4	1	6	2	2	7	11	14	502	519	569	624	80	93	2214	1.78784	59	0.192	0.999998	0.270715	0.15039	Inf	no	1
TCGA-AC-A6IW	9	10	46	55	4	7	4	5	13	19	30	43	17	22	117	89	245	174	2	12	16	30	26	8	16	50	70	1665	1734	1956	1779	274	275	7134	2.73695	175	0.286	0.999998	0.493503	0.37512	Inf	yes	1
TCGA-E2-A1LL	2	7	10	12	0	4	2	3	3	9	9	2	4	14	23	22	63	33	0	0	3	3	2	1	1	4	6	313	326	352	362	48	54	1353	1.27273	57	0.095	0.999998	0.170527	0.0680328	Inf	no	1
TCGA-A7-A4SE	7	6	30	20	9	7	2	4	16	10	24	20	18	17	50	70	155	94	0	9	10	19	9	2	4	15	32	862	973	975	1044	163	136	3854	2.29873	123	0.206	0.999998	0.376895	0.253807	Inf	yes	1
TCGA-S3-AA12	6	5	17	12	4	1	1	2	5	8	2	2	11	8	22	24	65	33	1	2	1	4	1	1	2	4	6	337	328	341	347	48	51	1353	1.26354	59	0.092	0.999998	0.168567	0.067221	Inf	no	1
TCGA-A2-A04R	2	4	17	13	4	7	3	2	16	19	10	7	9	13	39	43	104	47	4	2	3	9	3	2	3	8	11	471	421	499	536	72	70	1927	1.70587	93	0.106	0.999999	0.233474	0.120283	Inf	no	1
TCGA-3C-AALK	1	6	14	21	3	1	0	0	3	7	3	6	4	7	34	20	65	44	1	2	1	4	3	4	4	11	10	418	414	510	462	66	76	1804	1.5557	55	0.154	0.999999	0.220913	0.109869	Inf	no	1
TCGA-A2-A4S3	8	9	14	29	6	3	4	1	7	15	12	3	18	13	47	33	111	58	1	4	5	10	2	5	4	11	15	557	569	660	592	74	100	2378	1.86088	96	0.135	0.999999	0.271591	0.154149	Inf	no	1
TCGA-PL-A8LV	10	11	26	26	3	5	2	5	11	13	29	19	15	21	58	66	160	100	3	7	13	23	7	4	7	18	34	1041	971	1062	1026	160	150	4100	2.29006	126	0.212	0.999999	0.376326	0.256536	Inf	yes	1
TCGA-BH-A0AV	4	5	14	16	5	4	7	3	6	4	8	11	16	12	31	28	87	49	1	1	3	5	5	0	3	8	12	477	502	524	506	80	74	2009	1.63795	75	0.138	0.999999	0.23608	0.124908	Inf	no	1
TCGA-EW-A1J2	2	1	18	6	1	4	1	0	5	2	0	3	4	5	11	23	43	27	0	3	0	3	1	0	0	1	4	243	284	271	309	51	41	1107	0.933977	39	0.093	0.999999	0.125007	0.0391452	Inf	no	1
TCGA-A2-A25E	3	7	11	10	3	2	1	2	3	8	7	8	7	11	26	21	65	36	1	3	1	5	1	0	2	3	7	361	363	368	384	61	60	1476	1.20845	58	0.108	0.999999	0.175554	0.0754602	Inf	no	1
TCGA-AC-A6NO	3	5	14	10	1	1	1	0	4	7	1	1	5	6	18	19	48	26	2	1	0	3	1	0	1	2	3	248	227	310	281	30	26	1066	1.21772	45	0.062	0.999999	0.1056	0.026652	Inf	no	1
TCGA-OL-A5S0	2	2	12	17	0	1	1	2	1	2	2	4	3	5	23	15	46	35	0	0	0	0	2	0	4	6	6	330	309	409	387	51	58	1435	1.2519	40	0.13	1	0.159066	0.0638001	Inf	no	1
TCGA-AR-A0TT	2	5	18	22	5	2	4	3	3	4	4	5	11	10	31	25	77	49	0	3	3	6	1	0	5	6	12	487	469	532	521	92	70	2009	1.59184	65	0.156	1	0.227273	0.120287	Inf	no	1
TCGA-B6-A409	5	2	17	13	0	1	0	2	6	5	2	3	5	5	21	25	56	35	1	1	1	3	2	0	2	4	6	322	333	417	363	51	59	1435	1.21558	50	0.107	1	0.156234	0.0626371	Inf	no	1
TCGA-B6-A401	1	1	9	9	1	1	1	1	2	4	0	1	3	3	14	11	31	19	0	0	0	0	1	0	0	1	1	165	143	241	230	26	32	779	0.427405	30	0.032	1	0.0444657	0.00212595	Inf	no	1
TCGA-A2-A3XU	4	2	10	6	0	3	0	0	0	6	1	2	4	5	14	11	34	19	0	0	0	0	0	1	1	2	1	188	164	194	233	27	25	779	0.432186	33	0.029	1	0.044209	0.00211381	Inf	no	1
TCGA-A7-A6VX	8	12	38	33	2	4	7	8	21	17	17	17	17	24	67	76	184	105	2	11	4	17	6	1	13	20	34	1034	1014	1102	1155	158	150	4305	2.37285	150	0.185	1	0.363773	0.249286	Inf	yes	1
TCGA-BH-A5IZ	7	5	13	22	6	6	1	1	7	14	6	11	14	12	47	26	99	52	1	1	3	5	1	3	7	11	12	519	496	599	518	76	74	2132	1.71846	87	0.121	1	0.223524	0.118935	Inf	no	1
TCGA-E2-A9RU	4	6	29	34	3	2	4	1	7	8	6	6	11	9	48	42	110	75	4	7	4	15	3	3	6	12	20	696	675	875	829	93	105	3075	2.29495	90	0.182	1	0.290477	0.178937	Inf	yes	1
TCGA-GM-A2DF	2	2	13	17	3	0	1	1	3	2	6	4	6	3	23	22	54	40	0	1	2	3	2	0	2	4	7	388	368	437	447	54	57	1640	1.39369	47	0.13	1	0.166649	0.0724056	Inf	no	1
TCGA-OL-A66O	3	4	11	9	0	1	1	0	3	3	2	2	4	5	14	16	39	24	0	0	0	0	1	0	1	2	2	209	218	256	301	37	37	984	0.627252	37	0.051	1	0.0712329	0.0118285	Inf	no	1
TCGA-B6-A0IJ	16	8	24	20	7	5	2	6	19	15	24	26	25	19	61	67	172	94	4	6	13	23	8	2	4	14	31	969	936	963	986	186	163	3854	1.84171	141	0.18	1	0.336058	0.225381	Inf	no	1
TCGA-A7-A6VV	4	1	14	20	1	1	1	0	7	5	10	3	6	2	28	31	67	47	1	0	3	4	3	1	3	7	9	450	438	514	525	61	79	1927	1.42112	58	0.134	1	0.187777	0.0909012	Inf	no	1
TCGA-B6-A0RE	12	14	31	35	8	9	3	7	14	18	33	19	23	30	72	78	203	118	4	9	12	25	11	4	8	23	40	1204	1188	1250	1196	192	187	4838	2.18774	163	0.197	1	0.371091	0.26124	Inf	yes	1
TCGA-A7-A2KD	2	3	21	14	4	3	0	2	1	4	3	3	6	8	21	25	60	41	1	4	1	6	1	1	1	3	7	421	424	420	416	55	59	1681	1.25203	53	0.117	1	0.158066	0.0687536	Inf	no	1
TCGA-S3-AA11	7	6	19	13	7	5	5	6	13	18	2	2	19	17	33	34	103	36	2	2	1	5	0	2	2	4	5	333	411	369	363	41	54	1476	1.07018	98	0.049	1	0.128856	0.0472015	Inf	no	1
TCGA-LL-A7T0	5	6	19	26	4	0	1	1	5	6	4	1	10	7	33	28	78	50	2	2	2	6	1	2	6	9	11	463	538	490	559	97	70	2050	1.38192	67	0.141	1	0.198901	0.103012	Inf	no	1
TCGA-LL-A7SZ	8	4	21	19	3	4	2	3	18	43	2	3	13	11	65	41	130	45	2	3	1	6	1	8	3	12	8	440	417	487	501	61	75	1845	1.2915	122	0.062	1	0.169509	0.0783917	Inf	no	1
TCGA-LD-A9QF	1	5	13	9	3	1	1	0	2	0	2	3	5	6	12	17	40	27	0	1	1	2	0	0	0	0	2	281	242	283	301	24	35	1107	0.733208	38	0.05	1	0.0684135	0.0114331	Inf	no	1
TCGA-LL-A740	4	6	16	20	6	1	1	2	6	5	2	2	11	9	27	24	71	40	1	3	0	4	1	1	2	4	6	364	372	474	430	45	56	1640	1.34257	65	0.085	1	0.143313	0.0581083	Inf	no	1
TCGA-E2-A570	3	2	10	8	0	0	1	2	2	1	3	1	4	4	10	15	33	22	0	0	1	1	0	1	0	1	1	183	202	259	258	26	27	902	0.443396	32	0.03	1	0.0390528	0.00188063	Inf	no	1
TCGA-AO-A12H	3	2	6	13	2	1	1	0	1	0	1	1	6	3	14	8	31	21	0	0	0	0	0	0	1	1	1	185	203	235	238	33	30	861	0.357521	30	0.032	1	0.0379906	0.00182408	Inf	no	1
TCGA-BH-A0BW	11	4	20	22	4	7	3	6	9	11	11	4	18	17	37	40	112	57	0	5	3	8	2	2	2	6	12	532	550	627	628	73	68	2337	1.87383	100	0.107	1	0.211357	0.113459	Inf	no	1
TCGA-AO-A125	3	1	10	17	2	2	0	1	2	5	3	2	5	4	24	15	48	32	1	1	1	3	0	0	2	2	4	274	333	354	351	55	53	1312	0.815972	44	0.083	1	0.10443	0.0331897	Inf	no	1
TCGA-S3-A6ZF	4	1	19	13	1	3	0	1	3	5	2	4	5	5	22	24	56	38	0	2	0	2	3	1	0	4	5	346	305	479	428	43	71	1558	1.04686	51	0.089	1	0.124097	0.0457126	Inf	no	1
TCGA-PL-A8LZ	8	4	24	31	4	5	2	1	27	17	4	9	14	10	57	55	136	68	1	5	1	7	0	1	10	11	16	635	630	774	749	92	99	2788	1.87619	120	0.118	1	0.240579	0.140628	Inf	no	1
TCGA-A7-A6VW	8	11	19	13	5	5	6	2	6	9	2	10	19	18	32	27	96	44	0	2	1	3	3	0	1	4	7	433	451	439	481	53	59	1804	1.30682	89	0.073	1	0.151901	0.0664782	Inf	no	1
TCGA-EW-A2FS	5	5	10	13	1	1	1	0	5	2	1	2	7	6	17	16	46	26	1	0	0	1	1	0	1	2	2	261	224	325	256	40	37	1066	0.58042	44	0.043	1	0.0610509	0.010189	Inf	no	1
TCGA-LL-A5YP	4	8	25	14	2	3	1	2	14	14	13	10	7	13	38	52	110	62	3	5	3	11	3	2	2	7	13	588	548	667	739	85	74	2542	1.85413	97	0.118	1	0.210766	0.11644	Inf	no	1
TCGA-AC-A5XU	5	3	31	38	1	3	2	1	10	10	5	5	8	7	53	46	114	79	2	5	1	8	4	2	10	16	20	727	767	895	850	114	115	3239	1.92914	94	0.175	1	0.258997	0.160216	Inf	no	1
TCGA-B6-A0WX	5	2	8	9	1	1	1	3	3	8	3	3	7	6	20	14	47	23	1	0	1	2	0	1	0	1	1	201	222	276	244	34	40	943	0.305523	46	0.021	1	0.034486	0.00166188	Inf	no	1
TCGA-AC-A3W5	8	6	36	48	8	8	9	7	9	21	33	30	25	21	99	78	223	147	2	8	18	28	10	5	12	27	48	1349	1369	1682	1627	197	230	6027	2.53042	175	0.215	1	0.380222	0.27752	Inf	yes	1
TCGA-OL-A66I	3	2	12	15	1	1	3	2	3	3	5	6	7	5	24	20	56	38	0	1	1	2	1	0	2	3	5	351	355	440	412	58	48	1558	1.0576	51	0.089	1	0.114372	0.0421188	Inf	no	1
TCGA-E2-A573	2	9	18	9	2	4	1	3	5	8	6	8	5	16	25	29	75	41	2	1	2	5	1	1	2	4	6	396	443	411	431	63	59	1681	1.01	69	0.08	1	0.127972	0.0519913	Inf	no	1
TCGA-A2-A3XX	4	0	10	16	2	3	0	2	2	6	3	5	6	5	27	15	53	34	0	0	1	1	0	0	3	3	4	308	345	386	355	61	53	1394	0.764706	49	0.075	1	0.0944878	0.0301708	Inf	no	1
TCGA-EW-A1OZ	4	5	22	22	1	0	2	4	6	2	5	4	7	9	28	33	77	53	2	2	2	6	1	0	4	5	9	498	487	571	617	73	67	2173	1.44097	68	0.117	1	0.161493	0.0789353	Inf	no	1
TCGA-OL-A5RU	3	3	11	17	0	3	0	0	1	3	3	2	3	6	22	15	46	33	0	0	1	1	0	0	1	1	2	294	283	403	373	22	54	1353	0.61882	44	0.043	1	0.0574537	0.0097377	Inf	no	1
TCGA-AC-A7VB	1	2	13	11	2	0	0	0	1	6	0	2	3	2	19	14	38	26	0	0	0	0	0	2	1	3	1	254	221	291	300	36	41	1066	0.295205	37	0.026	1	0.0315387	0.00152863	Inf	no	1
TCGA-OL-A6VO	1	4	10	12	2	0	1	0	6	17	3	3	4	4	32	19	59	28	1	1	1	3	0	4	0	4	2	266	257	334	291	55	45	1148	0.446429	57	0.034	1	0.0526606	0.00883627	Inf	no	1
TCGA-BH-A0E2	3	2	21	19	1	1	2	2	5	3	0	2	6	5	24	26	61	42	2	3	0	5	0	1	3	4	6	429	412	451	430	75	73	1722	0.850386	55	0.098	1	0.117422	0.0477568	Inf	no	1
TCGA-S3-A6ZG	4	5	18	18	2	1	0	4	0	2	3	3	6	10	23	21	60	42	0	1	1	2	0	0	3	3	5	395	381	457	489	57	69	1722	0.893802	55	0.083	1	0.107116	0.039753	Inf	no	1
TCGA-B6-A0I1	2	6	20	16	6	3	0	4	9	6	6	5	8	13	27	35	83	47	1	4	1	6	0	2	1	3	6	422	438	542	525	55	67	1927	1.1165	77	0.072	1	0.118784	0.0487485	Inf	no	1
TCGA-S3-AA17	11	14	27	22	5	7	5	3	14	15	8	18	21	24	55	49	149	75	1	1	3	5	6	1	6	13	16	775	748	767	785	98	116	3075	1.54717	133	0.107	1	0.211176	0.124318	Inf	no	1
TCGA-A2-A0CQ	5	1	16	15	2	3	0	0	3	1	2	3	7	4	19	21	51	36	1	0	0	1	1	0	2	3	3	347	310	414	405	48	46	1476	0.726064	48	0.059	1	0.0718128	0.0185683	Inf	no	1
TCGA-A2-A0D0	7	12	12	24	4	1	2	8	4	5	15	13	13	21	42	31	107	64	0	0	6	6	3	1	3	7	12	626	593	714	691	95	116	2624	1.24852	95	0.112	1	0.175163	0.0948529	Inf	no	1
TCGA-5T-A9QA	2	3	18	17	1	3	0	0	2	44	1	1	3	6	62	21	92	37	0	0	0	0	0	2	3	5	3	314	340	421	442	52	54	1517	0.660122	89	0.033	1	0.0698109	0.0180692	Inf	no	1
TCGA-LL-A5YN	3	2	11	15	1	1	1	2	4	3	1	2	5	5	20	16	46	29	0	0	0	0	0	0	1	1	1	301	293	315	280	31	47	1189	0.263042	45	0.022	1	0.0287008	0.00139508	Inf	no	1
TCGA-AO-A03P	1	2	16	24	1	3	2	0	3	6	2	4	4	5	34	21	64	46	1	3	0	4	0	1	3	4	6	445	470	496	475	76	62	1886	0.917769	58	0.094	1	0.108837	0.0445726	Inf	no	1
TCGA-PL-A8LX	3	5	13	11	5	1	1	0	2	2	3	3	9	6	16	18	49	30	0	0	0	0	0	0	1	1	1	258	292	337	343	38	37	1230	0.302222	48	0.02	1	0.0276794	0.00134866	Inf	no	1
TCGA-S3-AA10	16	10	22	22	4	11	4	6	10	73	20	18	24	27	113	52	216	82	0	4	6	10	4	3	5	12	19	769	831	833	929	154	121	3362	1.48461	197	0.088	1	0.21598	0.132735	Inf	no	1
TCGA-EW-A6SB	8	11	21	15	3	2	1	2	4	9	9	5	12	15	29	34	90	50	0	1	1	2	3	0	1	4	6	447	470	558	575	61	63	2050	1.09645	84	0.067	1	0.110375	0.0454846	Inf	no	1
TCGA-LL-A6FR	3	8	12	20	3	1	3	1	0	4	5	6	9	10	30	17	66	43	0	0	2	2	0	0	2	2	4	386	367	517	493	53	61	1763	0.824153	62	0.061	1	0.0828076	0.0268494	Inf	no	1
TCGA-AO-A03O	5	6	22	22	6	4	2	3	2	7	8	12	13	13	41	32	99	64	1	3	2	6	6	0	1	7	12	624	698	652	650	109	89	2624	1.23295	87	0.121	1	0.164684	0.0891419	Inf	no	1
TCGA-UL-AAZ6	7	9	31	25	6	7	2	6	14	15	14	8	15	22	48	59	144	78	2	7	5	14	3	2	1	6	16	689	774	843	892	129	100	3198	1.55414	128	0.111	1	0.193011	0.11401	Inf	no	1
TCGA-A7-A6VY	9	6	17	30	4	4	5	4	15	14	18	22	18	14	66	50	148	87	2	2	6	10	4	2	7	13	19	855	853	925	934	127	119	3567	1.65036	129	0.128	1	0.212679	0.131214	Inf	no	1
TCGA-E2-A1LK	1	2	13	24	0	2	1	6	1	4	3	0	2	10	28	17	57	40	0	0	3	3	0	1	0	1	3	335	379	427	499	61	39	1640	0.6945	54	0.053	1	0.0635555	0.0165309	Inf	no	1
TCGA-B6-A0IM	0	3	11	10	1	0	0	0	2	3	6	5	1	3	18	19	41	32	0	1	0	1	0	1	0	1	1	279	313	331	389	46	41	1312	0.258621	40	0.024	1	0.0254861	0.00124496	Inf	no	1
TCGA-LL-A6FQ	5	4	20	23	2	3	0	1	8	1	1	1	7	8	25	29	69	45	2	1	0	3	0	0	3	3	4	401	420	517	507	59	60	1845	0.764893	65	0.058	1	0.0773653	0.0251517	Inf	no	1
TCGA-OL-A97C	9	2	17	15	4	4	0	4	7	5	3	3	13	10	23	27	73	38	1	0	1	2	0	0	1	1	2	356	358	422	422	46	50	1558	0.462719	71	0.027	1	0.0447408	0.00763351	Inf	no	1
TCGA-E2-A56Z	4	6	17	17	1	2	1	2	1	6	4	2	6	10	25	22	63	40	1	0	0	1	0	1	2	3	2	365	364	438	473	40	42	1640	0.555488	61	0.032	1	0.0445163	0.00761457	Inf	no	1
TCGA-AC-A5EH	12	11	36	35	9	7	6	8	20	23	19	21	27	26	79	75	207	111	7	5	7	19	5	2	9	16	26	978	1061	1265	1247	148	148	4551	1.98783	181	0.126	1	0.241102	0.160004	Inf	no	1
TCGA-EW-A6SA	3	7	38	27	3	2	3	6	12	9	9	6	9	15	42	59	125	80	2	5	3	10	2	1	4	7	14	771	756	901	852	105	115	3280	1.39443	111	0.112	1	0.165694	0.0949107	Inf	no	1
TCGA-OL-A66P	14	12	21	18	2	8	6	6	13	13	7	6	22	26	37	41	126	52	2	3	0	5	1	1	1	3	5	542	496	567	527	65	84	2132	0.705989	121	0.04	1	0.08317	0.0312059	Inf	no	1
TCGA-A2-A25B	8	5	17	34	11	3	4	3	18	15	9	11	23	11	60	44	138	71	2	3	3	8	1	2	4	7	11	659	685	789	778	104	76	2911	1.34875	127	0.08	1	0.140265	0.0745593	Inf	no	1
TCGA-A7-A4SD	5	4	21	15	1	3	3	1	6	6	3	3	9	8	24	30	71	42	1	1	1	3	0	1	0	1	2	357	366	492	507	55	57	1722	0.424745	69	0.028	1	0.0402942	0.00690728	Inf	no	1
TCGA-LL-A8F5	12	17	36	28	8	13	5	9	19	14	20	21	25	39	63	75	202	105	2	5	9	16	4	3	4	11	22	976	925	1241	1163	143	154	4305	1.69594	180	0.109	1	0.207139	0.133074	Inf	no	1
TCGA-A2-A3Y0	22	14	32	41	6	8	6	7	19	16	38	37	34	29	94	89	246	148	3	5	15	23	13	2	5	20	38	1376	1411	1626	1655	204	203	6068	2.06983	208	0.154	1	0.269735	0.192146	Inf	yes	1
TCGA-E2-A576	2	2	24	18	3	5	1	1	8	4	6	0	6	8	22	38	74	48	1	1	1	3	0	1	1	2	3	473	442	509	544	66	69	1968	0.4875	71	0.041	1	0.0523364	0.0136993	Inf	no	1
TCGA-AC-A62X	6	2	34	17	2	1	4	1	7	8	3	3	12	4	28	44	88	57	3	3	1	7	1	3	0	4	5	501	496	667	673	75	57	2337	0.890484	83	0.057	1	0.0769794	0.0290596	Inf	no	1
TCGA-AC-A8OQ	4	11	44	31	5	2	3	3	8	17	9	5	12	16	53	61	142	89	1	7	2	10	1	3	6	10	16	830	869	1005	945	149	114	3649	1.33293	126	0.113	1	0.159593	0.0950298	Inf	no	1
TCGA-A2-A04P	12	11	19	28	8	7	8	5	16	12	24	19	28	23	59	59	169	90	2	2	6	10	6	1	2	9	16	862	886	988	954	146	145	3690	1.18641	153	0.095	1	0.158933	0.0947004	Inf	no	1
TCGA-OL-A5RZ	7	6	33	43	4	8	4	1	16	17	12	7	15	15	67	61	158	95	3	6	4	13	2	2	4	8	16	906	974	1023	992	135	146	3895	1.20772	142	0.101	1	0.154163	0.092101	Inf	no	1
TCGA-UU-A93S	6	9	45	29	12	7	4	5	26	51	21	14	22	21	94	92	229	109	4	8	7	19	2	4	4	10	21	985	1049	1199	1236	169	125	4469	1.59567	208	0.092	1	0.181328	0.115748	Inf	no	1
TCGA-A7-A13D	7	7	24	27	4	4	4	2	14	8	17	27	15	13	62	55	145	95	1	2	3	6	7	1	4	12	16	926	897	1044	1028	155	143	3895	1.17103	129	0.11	1	0.149547	0.0893959	Inf	no	1
TCGA-AC-A62V	3	5	30	31	1	4	1	3	6	7	9	7	5	12	45	45	107	77	3	3	3	9	2	2	1	5	9	703	685	887	882	104	109	3157	0.970733	98	0.084	1	0.104541	0.0522331	Inf	no	1
TCGA-A2-A3XV	4	5	13	10	1	3	2	0	4	5	1	2	7	8	17	18	50	26	0	0	0	0	0	0	0	0	0	220	240	328	278	27	26	1066	0	50	0	1	0	0	Inf	no	1
TCGA-A7-A5ZV	17	20	45	31	10	11	14	10	20	23	30	38	41	41	92	95	269	144	0	7	10	17	9	4	3	16	29	1337	1299	1551	1717	195	193	5904	1.69623	240	0.108	1	0.200813	0.137625	Inf	no	1
TCGA-AC-A2BK	8	5	12	29	4	3	2	2	14	15	11	11	14	10	55	37	116	63	1	0	2	3	2	2	0	4	4	579	576	737	691	80	75	2583	0.584946	112	0.034	1	0.0538042	0.0177549	Inf	no	1
TCGA-AC-A8OP	8	15	46	59	8	4	8	9	26	28	25	16	24	28	103	97	252	146	7	9	9	25	3	3	3	9	24	1268	1411	1676	1631	208	200	5986	1.33239	228	0.095	1	0.152319	0.101119	Inf	no	1
TCGA-OL-A5RV	0	1	5	6	1	0	2	0	0	1	2	0	3	1	7	7	18	13	0	0	0	0	0	0	0	0	0	147	116	121	149	17	22	533	0	18	0	1	0	0	Inf	no	1
TCGA-PL-A8LY	1	2	3	0	1	0	0	0	0	1	0	0	2	2	1	3	8	3	0	0	0	0	0	0	0	0	0	30	21	38	34	2	5	123	0	8	0	1	0	0	Inf	no	1
P-values shown are obtained from Fisher’s exact test as implemented in maftools. TCGA, The Cancer Genome Atlas; AA, African-American; APOBEC, apolipoprotein B mRNA editing catalytic polypeptide-like; A, adenine; C, cytosine; G, guanine; T, thymine; >, conversion from base on the left to the one on the right; n_mutations, total number of mutations; tcW/wGa, W corresponds to either A or T in 3 nucl…

## Sheet: Hispanic_APOBEC
Table SIII. APOBEC enrichment scores.
Tumor_Sample_Barcode	A>G	T>C	C>T	G>A	A>T	T>A	A>C	T>G	C>A	G>T	C>G	G>C	n_A	n_T	n_G	n_C	n_mutations	n_C>G_and_C>T	tCw_to_A	tCw_to_T	tCw_to_G	tCw	wGa_to_C	wGa_to_T	wGa_to_A	wGa	tCw_to_G+tCw_to_T	n_bg_A	n_bg_T	n_bg_G	n_bg_C	n_bg_tcw	n_bg_wga	n_bg_bases	APOBEC_Enrichment	non_APOBEC_mutations	fraction_APOBEC_mutations	fisher_pvalue	or	ci.up	ci.low	APOBEC_Enriched	fdr
24T	5	3	11	8	2	0	3	2	7	0	4	4	10	5	12	22	49	27	1	3	1	5	1	0	3	4	8	228	260	278	341	37	37	1107	2.47848	41	0.163	0.997864	0.339126	0.147893	Inf	yes	1
161T	4	4	6	6	2	1	0	3	13	14	4	1	6	8	21	23	58	17	0	2	2	4	0	0	0	0	4	178	152	168	199	23	25	697	1.79902	54	0.069	0.998215	0.244714	0.0723726	Inf	no	1
22T	7	11	10	7	2	2	1	4	2	4	4	3	10	17	14	16	57	24	0	4	1	5	2	0	0	2	7	198	219	264	303	43	28	984	2.32923	50	0.123	0.998286	0.309982	0.126636	Inf	yes	1
5T	1	2	0	4	1	0	0	2	1	1	4	1	2	4	6	5	17	9	0	0	0	0	1	0	0	1	1	72	97	97	103	14	12	369	0.854701	16	0.059	0.999374	0.0959343	0.00429206	Inf	no	1
149T	2	3	3	7	2	0	0	1	2	5	2	3	4	4	15	7	30	15	0	1	1	2	0	0	1	1	3	143	143	156	173	30	19	615	1.34286	27	0.1	0.999493	0.176898	0.0419735	Inf	no	1
140T	4	5	3	4	1	1	2	1	3	5	4	4	7	7	13	10	37	15	0	0	0	0	2	0	0	2	2	141	120	173	181	19	23	615	1.12381	35	0.054	0.999858	0.125196	0.0199342	Inf	no	1
17T	5	15	18	8	6	4	2	7	6	8	6	6	13	26	22	30	91	38	0	4	2	6	1	2	2	5	9	317	297	478	466	46	43	1558	2.51212	82	0.099	0.999971	0.254915	0.120969	Inf	yes	1
11T	3	7	6	8	1	2	0	0	2	2	2	3	4	9	13	10	36	19	0	1	0	1	1	0	0	1	2	177	171	218	213	26	36	779	0.731749	34	0.056	0.999994	0.0924461	0.015063	Inf	no	1
50T	7	7	2	8	1	0	3	1	4	2	2	4	11	8	14	8	41	16	0	0	0	0	1	0	0	1	1	132	143	202	179	15	16	656	0.768145	40	0.024	0.999995	0.0566361	0.00268003	Inf	no	1
171T	8	5	8	8	2	2	0	0	8	2	0	5	10	7	15	16	48	21	0	1	0	1	1	0	0	1	2	205	177	232	247	25	37	861	0.735791	46	0.042	0.999998	0.0862301	0.0141767	Inf	no	1
66T	6	3	10	8	1	5	0	3	3	4	3	2	7	11	14	16	48	23	1	1	1	3	0	1	0	1	2	212	179	272	280	21	38	943	0.813559	46	0.042	0.999999	0.0822116	0.0136138	Inf	no	1
170T	9	4	7	9	1	1	1	5	4	6	4	4	11	10	19	15	55	24	0	0	1	1	1	1	0	2	2	197	238	253	296	28	31	984	0.775424	53	0.036	1	0.075432	0.0125269	Inf	no	1
68T	11	9	16	8	9	3	8	8	4	0	15	15	28	20	23	35	106	54	0	0	2	2	1	0	0	1	3	398	383	678	755	51	62	2214	0.704523	103	0.028	1	0.0514312	0.0135411	Inf	no	1
168T	3	5	1	4	3	0	2	0	1	3	2	2	8	5	9	4	26	9	0	0	0	0	0	0	0	0	0	80	76	112	101	6	15	369	0	26	0	1	0	0	Inf	no	1
3T	9	4	7	5	2	3	2	2	4	3	1	2	13	9	10	12	44	15	1	0	0	1	0	0	0	0	0	127	142	157	189	17	21	615	0	44	0	1	0	0	Inf	no	1
P-values shown are obtained from Fisher’s exact test as implemented in maftools. APOBEC, apolipoprotein B mRNA editing catalytic polypeptide-like; A, adenine; C, cytosine; G, guanine; T, thymine; >, conversion from base on the left to the one on the right; n_mutations, total number of mutations; tcW/wGa, W corresponds to either A or T in 3 nucleotide sequence context.

## Sheet: African-American_APOBEC
Table SIII. APOBEC enrichment scores.
Tumor_Sample_Barcode	A>G	T>C	C>T	G>A	A>T	T>A	A>C	T>G	C>A	G>T	C>G	G>C	n_A	n_T	n_G	n_C	n_mutations	n_C>G_and_C>T	tCw_to_A	tCw_to_T	tCw_to_G	tCw	wGa_to_C	wGa_to_T	wGa_to_A	wGa	tCw_to_G+tCw_to_T	n_bg_A	n_bg_T	n_bg_G	n_bg_C	n_bg_tcw	n_bg_wga	n_bg_bases	APOBEC_Enrichment	non_APOBEC_mutations	fraction_APOBEC_mutations	fisher_pvalue	or	ci.up	ci.low	APOBEC_Enriched	fdr
74T	3	4	3	6	5	2	0	2	5	1	5	2	8	8	9	13	38	16	1	2	2	5	0	0	0	0	4	133	142	181	200	32	12	656	2.16477	34	0.105	0.998112	0.242174	0.0709298	Inf	yes	1
12T	2	3	3	6	2	1	3	3	5	2	2	2	7	7	10	10	34	13	0	1	0	1	0	0	1	1	2	106	123	149	155	18	19	533	1.26403	32	0.059	0.999484	0.144744	0.0226205	Inf	no	1
35T	3	4	6	9	3	3	0	3	2	1	0	3	6	10	13	8	37	18	0	1	0	1	1	0	1	2	3	178	170	199	191	23	29	738	1.25	34	0.081	0.999864	0.157674	0.0383098	Inf	no	1
173T	8	4	10	6	2	2	1	3	3	1	5	1	11	9	8	18	46	22	0	2	1	3	0	0	1	1	4	197	179	245	281	27	29	902	1.70779	42	0.087	0.999898	0.183763	0.0564039	Inf	no	1
174T	4	6	8	6	5	1	2	3	4	7	2	1	11	10	14	14	49	17	1	0	0	1	0	0	2	2	2	186	138	185	188	13	35	697	0.914216	47	0.041	0.999939	0.116598	0.0188013	Inf	no	1
6T	3	5	9	8	1	0	0	2	7	0	0	2	4	7	10	16	37	19	2	3	0	5	0	0	0	0	3	153	176	206	244	40	20	779	1.18421	34	0.081	0.99997	0.135176	0.0331238	Inf	no	1
147T	4	4	5	4	0	3	0	2	4	5	2	3	4	9	12	11	36	14	0	0	0	0	1	0	0	1	1	135	151	150	138	22	14	574	0.571429	35	0.028	0.999992	0.056185	0.00262526	Inf	no	1
14T	3	6	5	10	1	2	3	0	2	1	1	1	7	8	12	8	35	17	0	0	0	0	0	0	1	1	1	151	142	203	201	20	14	697	0.698962	34	0.029	0.999998	0.051438	0.00244346	Inf	no	1
13T	1	4	6	7	2	1	1	2	2	1	4	2	4	7	10	12	33	19	0	0	0	0	0	0	1	1	1	144	144	227	264	16	25	779	0.630295	32	0.03	0.999999	0.0493735	0.00236508	Inf	no	1
141T	3	5	9	10	6	6	2	0	5	5	9	5	11	11	20	23	65	33	1	1	2	4	1	2	1	4	5	310	325	350	368	55	59	1353	0.95428	60	0.077	1	0.132456	0.0482307	Inf	no	1
44T	18	19	11	10	6	7	10	3	8	10	9	8	34	29	28	28	119	38	1	1	1	3	1	2	2	5	5	288	297	548	425	35	34	1558	1.85545	114	0.042	1	0.128709	0.0473953	Inf	no	1
151T	7	5	3	4	2	6	2	2	10	9	3	0	11	13	13	16	53	10	0	0	0	0	0	1	0	1	0	96	85	115	114	10	8	410	0	53	0	1	0	0	Inf	no	1
63T	17	19	30	42	4	3	3	7	12	13	19	13	24	29	68	61	182	104	0	2	6	8	1	1	4	6	13	978	992	1147	1147	152	155	4264	0.934039	169	0.071	1	0.109515	0.0623291	Inf	no	1
P-values shown are obtained from Fisher’s exact test as implemented in maftools. APOBEC, apolipoprotein B mRNA editing catalytic polypeptide-like; A, adenine; C, cytosine; G, guanine; T, thymine; >, conversion from base on the left to the one on the right; n_mutations, total number of mutations; tcW/wGa, W corresponds to either A or T in 3 nucleotide sequence context.

## Sheet: TCGA_Hisp_APOBEC
Table SIII. APOBEC enrichment scores.
Tumor_Sample_Barcode	A>G	T>C	C>T	G>A	A>T	T>A	A>C	T>G	C>A	G>T	C>G	G>C	n_A	n_T	n_G	n_C	n_mutations	n_C>G_and_C>T	tCw_to_A	tCw_to_T	tCw_to_G	tCw	wGa_to_C	wGa_to_T	wGa_to_A	wGa	tCw_to_G+tCw_to_T	n_bg_A	n_bg_T	n_bg_G	n_bg_C	n_bg_tcw	n_bg_wga	n_bg_bases	APOBEC_Enrichment	non_APOBEC_mutations	fraction_APOBEC_mutations	fisher_pvalue	or	ci.up	ci.low	APOBEC_Enriched	fdr
TCGA-EW-A1OV	2	0	52	39	1	1	1	0	8	3	15	19	4	1	61	75	141	125	1	31	12	44	12	1	24	37	79	1244	1398	1229	1254	254	222	5125	3.29676	62	0.56	0.278454	1.13876	0.821053	Inf	yes	1
TCGA-EW-A1IX	1	0	8	13	0	0	0	0	2	6	9	5	1	0	24	19	44	35	1	4	7	12	4	1	7	12	22	362	401	344	328	59	65	1435	3.40645	22	0.5	0.394776	1.17602	0.619382	Inf	yes	1
TCGA-E2-A2P6	4	4	67	68	3	2	1	1	2	4	15	21	8	7	93	84	192	171	1	41	13	55	13	1	32	46	99	1662	1709	1739	1901	297	283	7011	3.63339	93	0.516	0.524468	1.00341	0.764735	Inf	yes	1
TCGA-AC-A2FK	0	1	1	0	0	1	0	0	0	0	0	0	0	2	0	1	3	1	0	1	0	1	0	0	0	0	1	11	6	8	16	1	1	41	12	2	0.333	0.545455	Inf	0.0438531	Inf	yes	1
TCGA-5L-AAT0	2	3	83	96	3	2	3	1	10	10	33	34	8	6	140	126	280	246	4	43	24	71	24	3	48	75	139	2542	2455	2634	2455	393	406	10086	3.59886	141	0.496	0.70312	0.940566	0.75123	Inf	yes	1
TCGA-EW-A6SD	5	2	19	14	3	0	0	1	6	11	6	10	8	3	35	31	77	49	3	8	4	15	6	1	6	13	24	484	478	573	474	79	77	2009	3.28728	53	0.312	0.924552	0.685992	0.405443	Inf	yes	1
TCGA-GM-A2DM	5	5	7	2	1	2	0	0	3	2	0	1	6	7	5	10	28	10	1	3	0	4	0	0	1	1	4	92	94	101	123	22	15	410	2.42162	24	0.143	0.934542	0.465785	0.120421	Inf	yes	1
TCGA-E2-A1AZ	2	4	11	17	1	2	3	1	13	9	5	13	6	7	39	29	81	46	2	3	5	10	9	1	4	14	21	444	448	517	477	73	77	1886	3.02522	60	0.259	0.960035	0.617335	0.357059	Inf	yes	1
TCGA-EW-A1OX	0	1	7	3	1	3	1	0	1	2	2	2	2	4	7	10	23	14	0	2	0	2	2	0	1	3	5	156	150	139	129	29	26	574	1.74026	18	0.217	0.984596	0.353011	0.111486	Inf	no	1
TCGA-EW-A1IW	4	3	39	36	3	2	0	3	3	9	17	10	7	8	55	59	129	102	2	18	10	30	6	1	15	22	49	1062	1016	1032	1072	184	184	4182	2.74659	80	0.38	0.986034	0.653789	0.458441	Inf	yes	1
TCGA-EW-A1PG	2	0	4	2	2	1	0	0	0	1	0	0	4	1	3	4	12	6	0	0	0	0	0	0	1	1	1	60	67	63	56	10	13	246	0.862319	11	0.083	0.994535	0.14148	0.0058808	Inf	no	1
TCGA-EW-A1J3	5	2	10	6	0	1	2	0	2	0	2	2	7	3	8	14	32	20	1	3	0	4	0	0	1	1	4	193	179	235	213	28	37	820	1.37846	28	0.125	0.999787	0.192559	0.0582785	Inf	no	1
TCGA-EW-A1PE	3	2	14	6	1	0	0	2	3	5	2	2	4	4	13	19	40	24	0	4	0	4	0	0	1	1	5	230	220	257	277	31	38	984	1.61232	35	0.125	0.999863	0.210704	0.0742419	Inf	no	1
TCGA-EW-A2FW	2	0	9	9	2	0	0	1	3	3	0	0	4	1	12	12	29	18	1	2	0	3	0	1	1	2	3	187	148	198	205	27	24	738	1.31699	26	0.103	0.999889	0.154068	0.0374683	Inf	no	1
TCGA-AO-A12B	3	1	6	5	2	2	1	1	0	4	1	0	6	4	9	7	26	12	0	1	0	1	0	0	0	0	1	93	135	142	122	14	15	492	0.758621	25	0.038	0.999925	0.0727537	0.00335707	Inf	no	1
TCGA-EW-A1P6	5	1	8	8	1	1	1	0	0	2	0	0	7	2	10	8	27	16	0	1	0	1	0	0	1	1	2	153	164	160	179	23	23	656	0.921196	25	0.074	0.999951	0.110872	0.017762	Inf	no	1
TCGA-AR-A1AN	3	1	8	12	1	0	0	1	0	2	2	4	4	2	18	10	34	26	0	0	1	1	2	0	2	4	5	242	245	257	322	45	36	1066	1.37464	29	0.147	0.999979	0.180115	0.0641589	Inf	no	1
TCGA-EW-A1PA	1	4	14	5	2	2	0	1	3	2	5	4	3	7	11	22	43	28	1	2	0	3	2	0	1	3	5	250	271	301	326	45	36	1148	1.38228	38	0.116	0.999994	0.165022	0.0592028	Inf	no	1
TCGA-B6-A2IU	5	1	16	24	0	0	1	2	1	3	2	0	6	3	27	19	55	42	1	3	1	5	0	0	6	6	10	423	397	432	470	70	68	1722	1.55625	45	0.182	0.999997	0.23181	0.114799	Inf	no	1
TCGA-EW-A2FV	3	2	8	9	0	2	1	1	2	4	0	0	4	5	13	10	32	17	0	0	0	0	0	1	1	2	1	173	149	171	204	21	31	697	0.424208	31	0.031	0.999998	0.0510792	0.00242662	Inf	no	1
TCGA-A2-A04N	6	0	15	14	0	3	2	1	4	6	2	0	8	4	20	21	53	31	0	3	1	4	0	1	1	2	5	328	285	301	357	46	48	1271	1.12903	48	0.094	0.999999	0.148761	0.0539053	Inf	no	1
TCGA-AR-A1AV	2	4	17	12	2	0	0	4	3	4	2	1	4	8	17	22	51	32	1	4	1	6	0	1	0	1	5	326	316	352	318	44	57	1312	1.03651	46	0.098	1	0.140551	0.0510002	Inf	no	1
TCGA-EW-A1PD	4	4	19	11	1	7	1	7	9	9	10	13	6	18	33	38	95	53	2	5	4	11	4	0	1	5	14	501	599	518	555	108	80	2173	1.50763	81	0.147	1	0.242316	0.134184	Inf	no	1
TCGA-AO-A0JM	1	2	17	10	0	4	2	3	5	2	2	4	3	9	16	24	52	33	2	1	0	3	4	0	1	5	6	364	326	337	326	62	67	1353	0.934461	46	0.115	1	0.151584	0.0603678	Inf	no	1
TCGA-EW-A1P4	10	7	9	14	3	3	4	3	5	5	7	9	17	13	28	21	79	39	0	0	3	3	3	2	1	6	7	341	427	417	414	63	43	1599	1.40711	72	0.089	1	0.161255	0.0698478	Inf	no	1
TCGA-EW-A423	4	6	25	32	0	4	1	2	3	3	6	5	5	12	40	34	91	68	0	8	5	13	2	1	3	6	18	535	729	780	744	122	73	2788	2.06878	73	0.198	1	0.258788	0.154911	Inf	yes	1
TCGA-EW-A1J6	2	2	5	14	1	0	1	0	5	7	2	5	4	2	26	12	44	26	0	1	0	1	0	0	1	1	2	265	223	304	274	33	44	1066	0.577423	42	0.045	1	0.0656564	0.0109628	Inf	no	1
TCGA-EW-A1PH	8	4	13	16	3	1	0	1	1	9	3	7	11	6	32	17	66	39	0	2	0	2	4	1	0	5	6	393	399	370	437	70	62	1599	0.940559	60	0.091	1	0.13189	0.0534179	Inf	no	1
TCGA-EW-A1OY	3	3	25	22	1	4	1	0	5	5	1	11	5	7	38	31	81	59	1	1	0	2	4	1	5	10	10	537	578	700	604	77	96	2419	1.27755	71	0.123	1	0.158164	0.0805884	Inf	no	1
TCGA-AR-A0U3	1	1	15	10	1	2	0	1	5	3	1	1	2	4	14	21	41	27	2	0	0	2	0	0	0	0	0	235	244	307	321	38	40	1107	0	41	0	1	0	0	Inf	no	1
TCGA-EW-A1J1	0	0	6	5	2	1	1	0	1	5	0	2	3	1	12	7	23	13	0	0	0	0	0	0	0	0	0	102	123	153	155	16	14	533	0	23	0	1	0	0	Inf	no	1
TCGA-EW-A1P1	0	0	1	0	0	0	0	1	0	1	0	0	0	1	1	1	3	1	0	0	0	0	0	0	0	0	0	12	6	8	15	1	0	41	0	3	0	1	0	0	Inf	no	1
TCGA-EW-A1P7	0	2	2	5	1	1	0	1	2	7	3	1	1	4	13	7	25	11	0	0	0	0	0	0	0	0	0	92	103	144	112	15	20	451	0	25	0	1	0	0	Inf	no	1
P-values shown are obtained from Fisher’s exact test as implemented in maftools. TCGA, The Cancer Genome Atlas; Hisp, Hispanic; APOBEC, apolipoprotein B mRNA editing catalytic polypeptide-like; A, adenine; C, cytosine; G, guanine; T, thymine; >, conversion from base on the left to the one on the right; n_mutations, total number of mutations; tcW/wGa, W corresponds to either A or T in 3 nucleotide…
